# Supplementary material for: Multifunctional glycerol/citric acid crosslinked polymer hydrophilic gel with absorptive and reducing properties
Source: Royal Society of Chemistry journal article supplement (doi:10.1039/d0nj06138g), 2021-01-01
Supplement: d0nj06138g1.pdf [file d0nj06138g1.pdf]

Supplementary Information for

## **Multifunctional Glycerol/Citric Acid Crosslinked Polymer Hydrophilic Gel with Absorptive and Reducing Capacities**

Fernanda G. Mendonça,<sup>\*a, †</sup> Izadora R. S. Menezes,<sup>a</sup> Ingrid F. Silva,<sup>a</sup> Rochel M. Lago<sup>a</sup>

<sup>a</sup>*Departamento de Química, ICEx, Universidade Federal de Minas Gerais, Belo Horizonte, MG, Brazil*

<sup>†</sup> *Current address: Department of Chemistry and Biomolecular Sciences and Centre for Catalysis Research and Innovation, University of Ottawa, Ottawa, ON, Canada*

\*nandagm@ufmg.br; fgomesme@uottawa.ca

The Scherrer equation (Equation S1) was used to calculate the crystallite size, considering that  $L$  is the average diameter of the particles, in nanometers,  $K$  is a constant which depends on the shape of the particles (for spherical particles,  $K = 0.94$ ),  $\lambda$  is the wavelength of the  $K\alpha$  radiation (0.154 nm for Cu),  $\beta$  is the full width at half maximum of the most intense diffraction peak, in radian, and  $\theta$  is the incidence angle according to the plane.

$$L = \frac{K\lambda}{\beta \cos\theta} \quad \text{Equation S1}$$

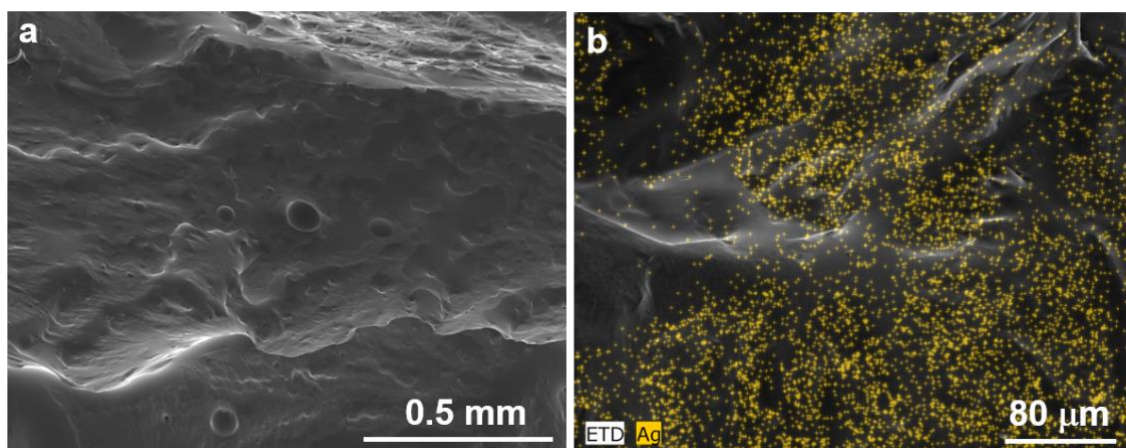

**Figure S1.** SEM images obtained for the gel after adsorption/reduction of  $\text{Ag}^+$  (in  $\text{AgNO}_3$   $0.1 \text{ mol L}^{-1}$ ) with SE (a) and (b) EDS for chemical mapping of Ag.

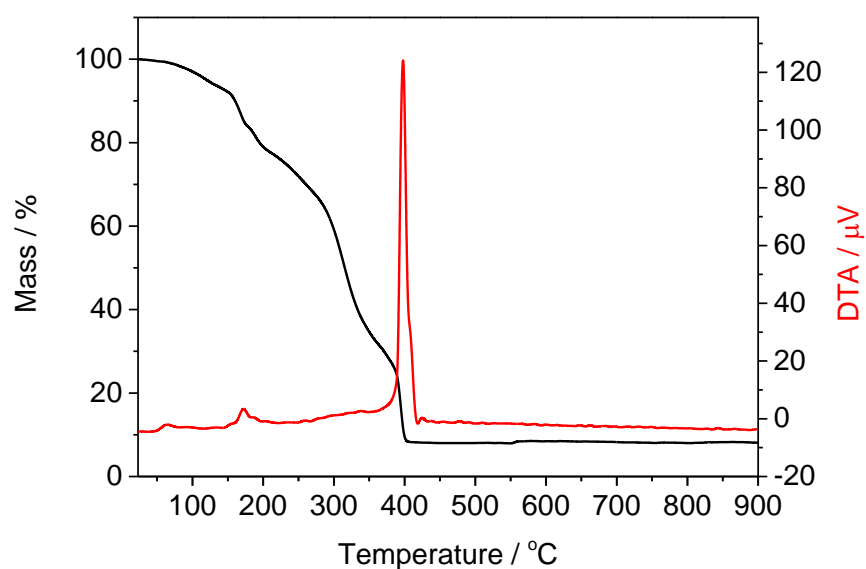

**Figure S2.** TG and DTA curves obtained in dynamic air atmosphere obtained for the gel after adsorption/reduction of  $\text{Ag}^{\text{I}}$  (in  $\text{AgNO}_3$   $0.1 \text{ mol L}^{-1}$ ).
